# Supplementary material for: Evaluation of the Birmingham IBS symptom questionnaire
Source: PubMed Central journal article supplement (PMC2496907; doi:10.1186/1471-230x-8-30), 2008-07-23
Supplement: 1471-230X-8-30-S1.pdf [file 1471-230X-8-30-S1.pdf]

### BIRMINGHAM IBS SYMPTOM QUESTIONNAIRE (unvalidated)

The following questions ask you about your abdominal and bowel symptoms. When we use the word abdomen we mean belly/tummy. Some of the questions ask about passing a stool. By this we mean going to the toilet for a reason other than to urinate (pass water). All of these questions refer to the last 4 weeks.

Please tick one box for each statement.

|                                                                                                                                                           | All of the time | Most of the time | A good bit of the time | Some of the time | A little of the time | None of the time |
|-----------------------------------------------------------------------------------------------------------------------------------------------------------|-----------------|------------------|------------------------|------------------|----------------------|------------------|
| 1. During the last 4 weeks, how often have you had discomfort or pain in your abdomen?                                                                    |                 |                  |                        |                  |                      |                  |
| 2. How often have you been troubled with loose, mushy or watery bowel motions during the last 4 weeks?                                                    |                 |                  |                        |                  |                      |                  |
| 3. How often during the last 4 weeks have you been troubled with diarrhoea?                                                                               |                 |                  |                        |                  |                      |                  |
| 4. During the last 4 weeks how often have you been troubled by hard bowel motions?                                                                        |                 |                  |                        |                  |                      |                  |
| 5. During the last 4 weeks how often have you felt the need to strain to pass a motion (stool)?                                                           |                 |                  |                        |                  |                      |                  |
| 6. During the last 4 weeks how often have you been troubled by constipation?                                                                              |                 |                  |                        |                  |                      |                  |
| 7. During the last 4 weeks how often did you experience pain or discomfort in your abdomen after eating?                                                  |                 |                  |                        |                  |                      |                  |
| 8. How often has your abdominal pain prevented you from sleeping, or woken you during the night during the last 4 weeks?                                  |                 |                  |                        |                  |                      |                  |
| 9. During the last 4 weeks how often have you leaked or soiled yourself?                                                                                  |                 |                  |                        |                  |                      |                  |
| 10. How often during the last 4 weeks have you suffered from a feeling of urgency (feeling that you must immediately rush to the toilet to pass a stool)? |                 |                  |                        |                  |                      |                  |
| 11. How often have you passed mucus or slime in your stools over the last 4 weeks?                                                                        |                 |                  |                        |                  |                      |                  |
| 12. During the last 4 weeks how often have you felt that after finishing a bowel movement there was still a stool which needed to be passed?              |                 |                  |                        |                  |                      |                  |
| 13. How often during the last 4 weeks have you experienced troublesome flatulence (passage of wind)?                                                      |                 |                  |                        |                  |                      |                  |
| 14. During the last 4 weeks how often did you find that your abdominal pain spread to your back and shoulders?                                            |                 |                  |                        |                  |                      |                  |
